# Supplementary material for: Accuracy of ECG interpretation in competitive athletes: the impact of using standardised ECG criteria
Source: HighWire-hosted journal article supplement (doi:10.1136/bjsports-2012-090612), 2012-02-05
Supplement: bjsports-2012-090612_ds1.pdf [file bjsports-2012-090612_ds1.pdf]

## ECG Interpretation in Athletes

### Abnormal ECG Criteria in Athletes

Any abnormal finding is considered training-unrelated and suggests the possibility of underlying pathologic cardiac disease, requiring further diagnostic work-up.

| Abnormal ECG Finding               | Definition                                                                                                                                                     |
|------------------------------------|----------------------------------------------------------------------------------------------------------------------------------------------------------------|
| T wave Inversion                   | > 1 mm in depth from baseline in two or more adjacent leads not including aVR or V1 ( <sup>1</sup> note exception below – Figure 1)                            |
| ST Segment Depression              | ≥ 1 mm in depth in two or more adjacent leads                                                                                                                  |
| Pathologic Q waves                 | > 3 mm in depth or > 0.04 sec in duration in two or more leads                                                                                                 |
| Complete Left Bundle Branch Block  | QRS > 0.12 sec, predominantly negative QRS complex in lead V <sub>1</sub> (QS or rS), and upright monophasic R wave in leads I and V <sub>6</sub> (Figure 2)   |
| Complete Right Bundle Branch Block | QRS > 0.12 sec, terminal R wave in lead V <sub>1</sub> (rsR'), and wide terminal S wave in leads I and V <sub>6</sub> (Figure 3)                               |
| Intra-Ventricular Conduction Delay | Non-specific, QRS > 0.12 sec                                                                                                                                   |
| Left Atrial Enlargement            | Prolonged P wave duration of > 0.12 sec in leads I or II with negative portion of the P wave ≥ 1 mm in depth and ≥ 0.04 sec in duration in lead V <sub>1</sub> |
| Left Axis Deviation                | -30° to -90°                                                                                                                                                   |
| Right Atrial Enlargement           | High/pointed P wave ≥ 2.5 mm in leads II and III or V <sub>1</sub>                                                                                             |
| Right Ventricular Hypertrophy      | Right axis deviation ≥ 120°, tall R wave in V1 + persistent precordial S waves (R-V <sub>1</sub> + S-V <sub>5</sub> > 10.5 mm)                                 |
| Mobitz Type II 2° AV Block         | Intermittently non-conducted P waves not preceded by PR prolongation and not followed by PR shortening                                                         |
| 3° AV Block                        | Complete heart block                                                                                                                                           |
| Ventricular Pre-excitation         | PR interval < 0.12 sec with a delta wave (slurred upstroke in the QRS complex – Figure 4)                                                                      |
| Long QT interval                   | QTc ≥ 0.47 sec (99% males)<br>QTc ≥ 0.48 sec (99% females)<br>[QTc ≥ 0.50 sec (unequivocal LQTS) [Figure 5]                                                    |
| Short QT interval                  | QTc ≤ 0.34 sec                                                                                                                                                 |
| Brugada-like ECG Pattern           | High take-off and downsloping ST segment elevation in V <sub>1</sub> -V <sub>3</sub> (Figure 6)                                                                |
| Epsilon Wave                       | Small negative deflection just beyond the QRS in V <sub>1</sub> or V <sub>2</sub> (Figure 7)                                                                   |
| Profound Sinus bradycardia         | < 30 BPM or sinus pauses ≥ 3 sec                                                                                                                               |
| Atrial Tachyarrhythmias            | Supraventricular tachycardia, atrioventricular nodal reentrant tachycardia, , atrial-fibrillation, atrial-flutter                                              |
| Premature Ventricular Contractions | ≥ 2 per tracing                                                                                                                                                |
| Ventricular Arrhythmias            | Couplets, triplets, non-sustained ventricular tachycardia                                                                                                      |

<sup>1</sup>Note: Exception to T wave inversion: elevated ST-segment with an upward (“domed”) convexity, followed by a negative T-wave in V<sub>2</sub>-V<sub>4</sub> is a common pattern of early repolarization seen in athletes of African-Caribbean descent and should be considered normal (Figure 1). This should not to be confused with the downsloping ST segment elevation in V<sub>1</sub>-V<sub>3</sub> found in a Brugada-like ECG pattern which is abnormal (Figure 6).

### Common ECG Findings in Athletes

Training-related ECG alterations are common, physiologic adaptations to regular exercise and are considered normal variants in athletes.

- |                          |                                                                                |
|--------------------------|--------------------------------------------------------------------------------|
| 1) Sinus bradycardia     | 4) Incomplete RBBB                                                             |
| 2) Sinus arrhythmia      | 5) Early repolarization                                                        |
| 3) First degree AV block | 6) Isolated QRS voltage criteria for left ventricular hypertrophy <sup>2</sup> |

<sup>2</sup>Note: Isolated increases in QRS amplitude are common in trained athletes. However, QRS voltage criteria for LVH + any non-voltage criteria for LVH (such as atrial enlargement, left axis deviation, a ‘strain’ pattern of repolarization, ST-segment depression, T-wave inversion, or pathologic Q waves) is abnormal and requires further evaluation.

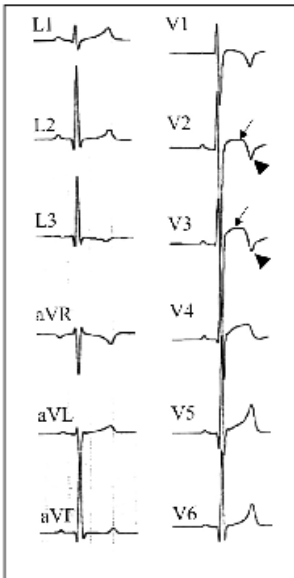

**Figure 1-** Normal variant of T wave inversion in athletes of African-Caribbean descent

**Left bundle branch block characteristics**

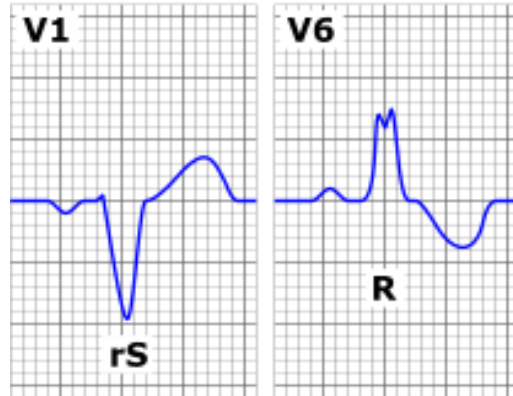

**Figure 2 –** Left Bundle Branch Block: QRS > 0.12 sec, predominantly negative QRS complex in lead V<sub>1</sub> (QS or rS), and upright monophasic R wave in leads I and V<sub>6</sub>

**Right bundle branch block characteristics**

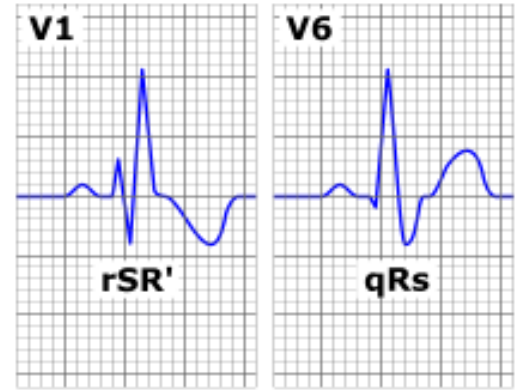

**Figure 3 –** Right Bundle Branch Block: QRS > 0.12 sec, terminal R wave in lead V<sub>1</sub> (rsR'), and wide terminal S wave in leads I and V<sub>6</sub>

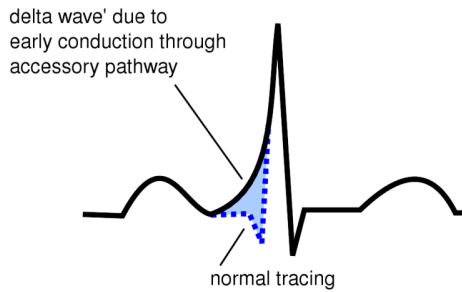

**Figure 4 –** Delta Wave: Suggestive of ventricular pre-excitation; PR interval < 0.12 sec with or without a delta wave (slurred upstroke in the QRS complex)

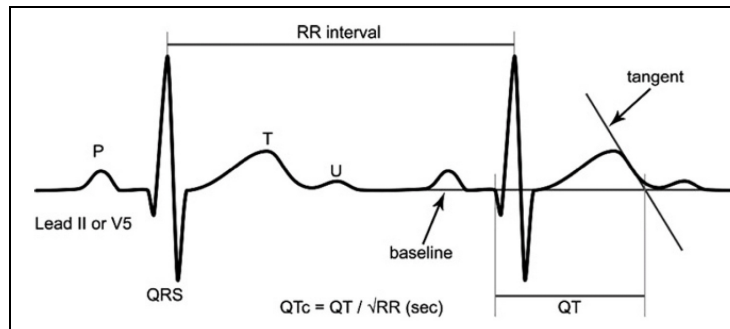

**Figure 5 –** QTc Interval: LONG QT : QTc ≥ 0.47 sec (99% males) or QTc ≥ 0.48 sec (99% females) [QTc ≥ 0.50 sec (unequivocal LQTS)]  
SHORT QT: QTc ≤ 0.34 sec

- Note:
1. Use Preceding RR Interval
  2. RR in sec
  3. QT in sec

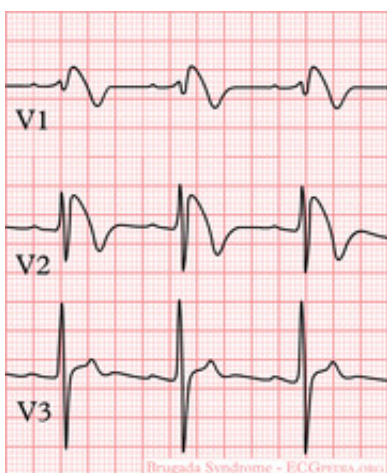

**Figure 6-** Brugada ECG: High take-off and downsloping ST segment elevation in V<sub>1</sub>-V<sub>3</sub>

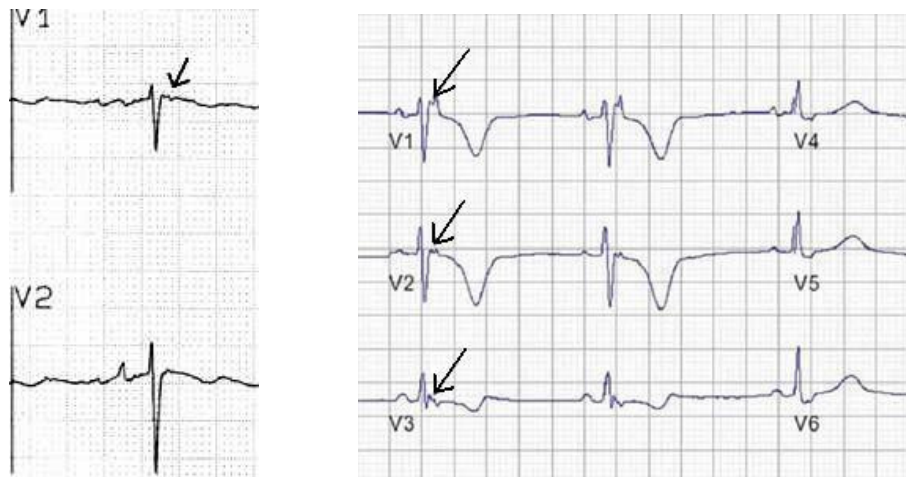

**Figure 7 –** Epsilon Wave: Small negative deflection just beyond the QRS in V<sub>1</sub> or V<sub>2</sub>
